# Supplementary material for: Navigator-3, a modulator of cell migration, may act as a suppressor of breast cancer progression
Source: PubMed Central journal article supplement (PMC4364947; doi:10.15252/emmm.201404134), 2015-02-12

Source File Supplementary Figure 7B

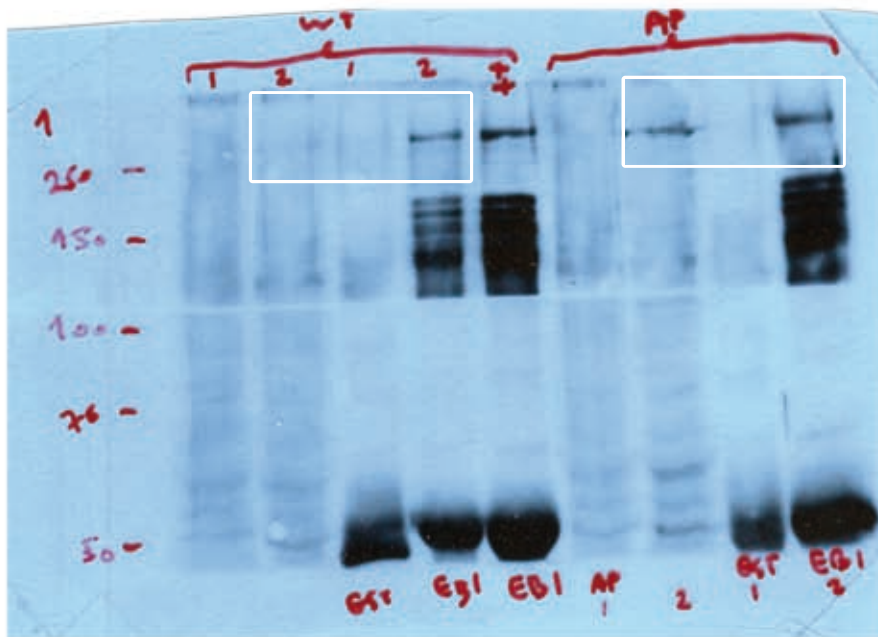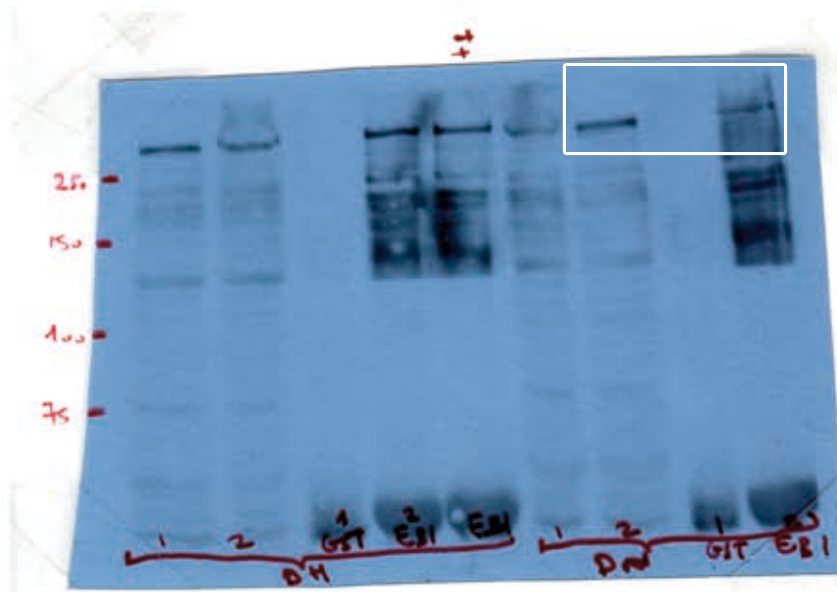

Supplement: emmm0007-0299-sd15.pdf [file emmm0007-0299-sd15.pdf]
