# Supplementary material for: Navigator-3, a modulator of cell migration, may act as a suppressor of breast cancer progression
Source: PubMed Central journal article supplement (PMC4364947; doi:10.15252/emmm.201404134), 2015-02-12
Supplement: emmm0007-0299-sd17.pdf [file emmm0007-0299-sd17.pdf]

Source File Figure 1D

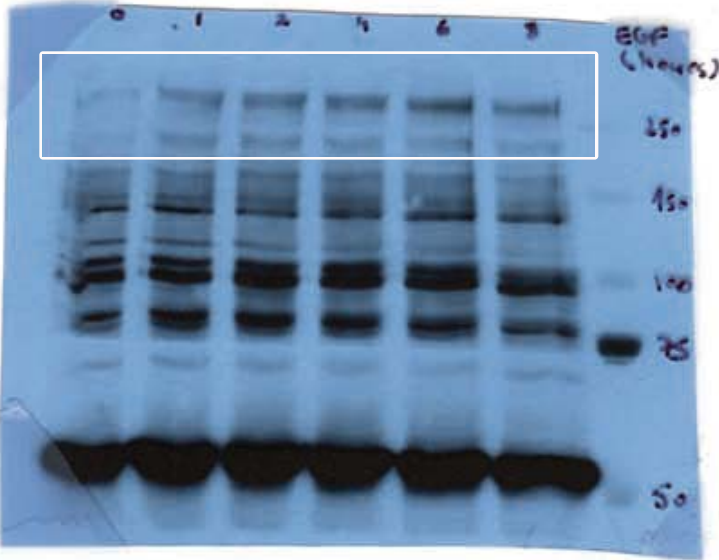

IB: NAV3

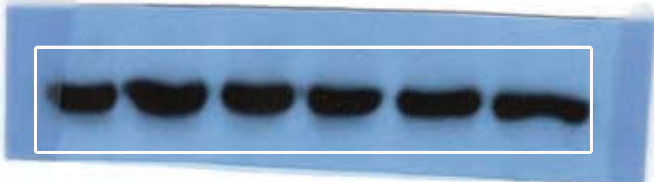

$\alpha$  tubulin  
lower exposure
